# Supplementary material
Source: MDPI journal article supplement (https://www.mdpi.com/2571-6255/7/5/157)
Supplement: s1 [file s1]

Archive with 2 entries (2 files):
- Supplemental Figure 1. Word cloud visualization of replies to open response question, 'Please.png
- Supplementary Table 1.pdf
