# Supplementary material
Source: MDPI journal article supplement (https://www.mdpi.com/2571-6255/7/5/157)

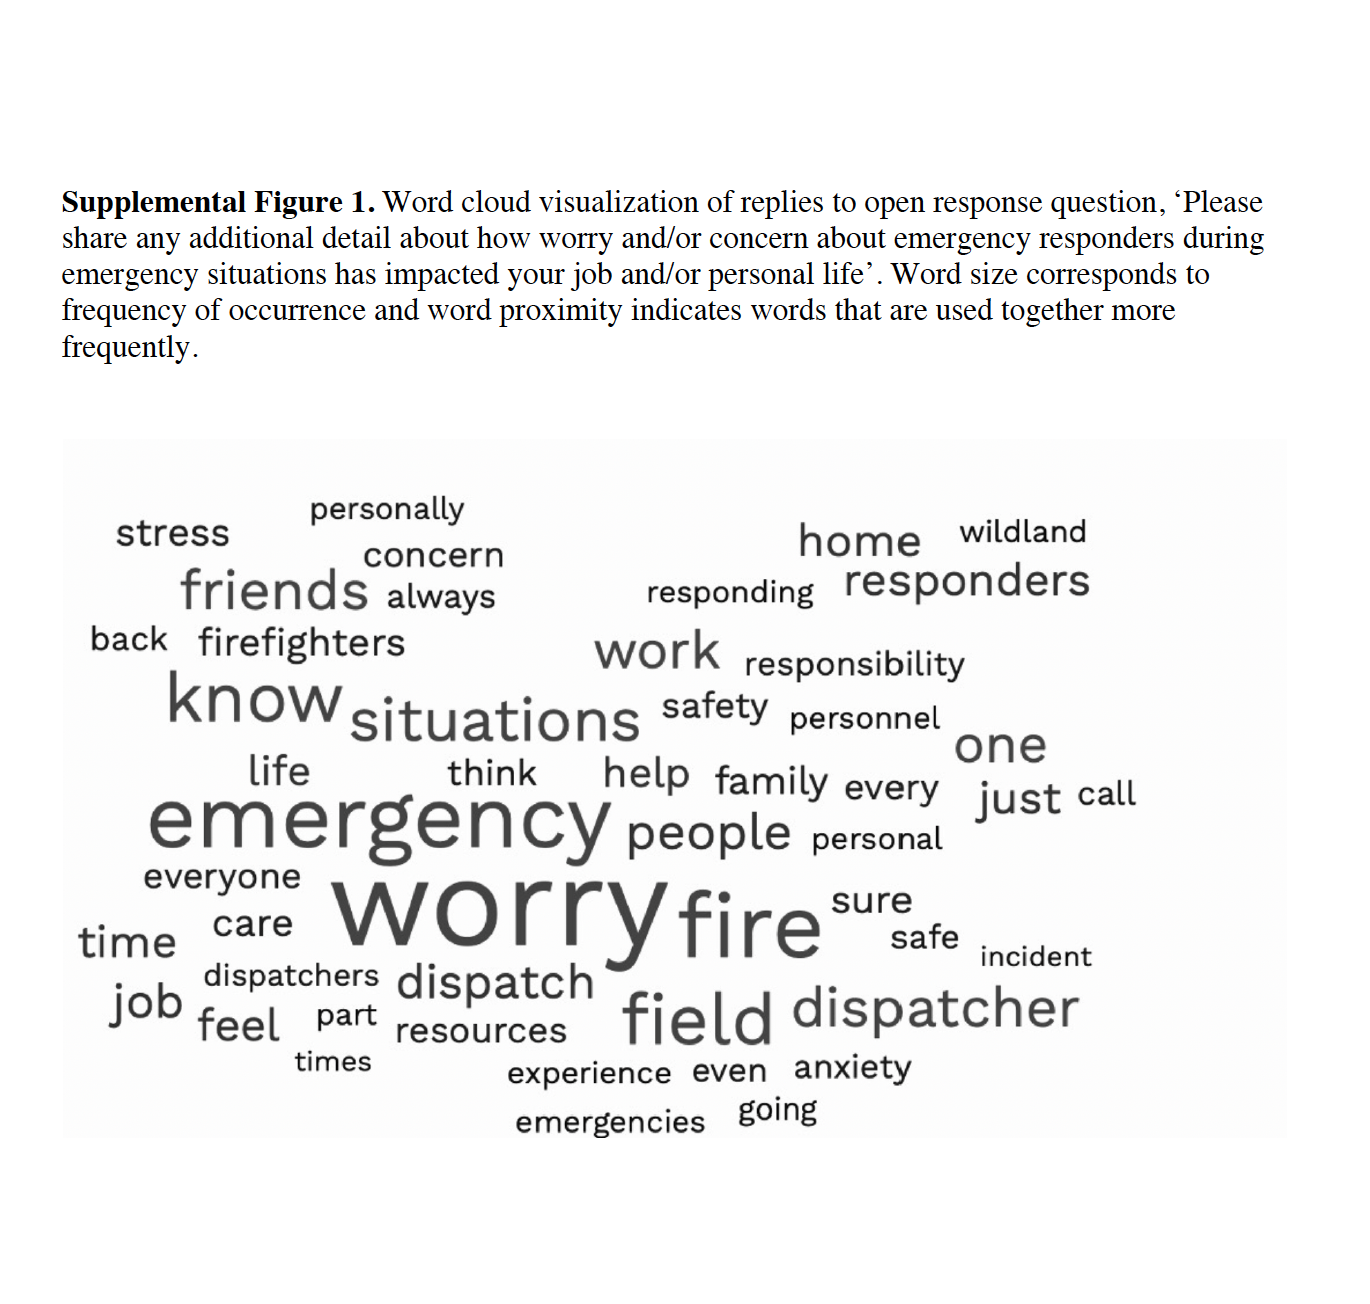

Supplement: s1 [file s1 › Supplemental Figure 1. Word cloud visualization of replies to open response question, 'Please.png]
